# Supplementary material for: Amyloidogenesis of SARS-CoV-2 Spike Protein
Source: PubMed Central journal article supplement (PMC9136918; doi:10.1021/jacs.2c03925), 2022-05-17
Supplement: ja2c03925_si_001.pdf [file ja2c03925_si_001.pdf]

# Supporting information

## Amyloidogenesis of SARS-CoV-2 Spike Protein

Sofie Nyström\*<sup>‡</sup>, Per Hammarström\*<sup>‡</sup>

<sup>‡</sup>Department of Physics, Chemistry and Biology, Linköping University, 58183, Linköping, Sweden.

\*e-mail: [sofie.nystrom@liu.se](mailto:sofie.nystrom@liu.se); [per.hammarstrom@liu.se](mailto:per.hammarstrom@liu.se)

### Table of contents

#### Supplementary Methods

**Supporting information:** Bulk S-protein peptide library sequences

**Supporting information:** Selection of amyloidogenic segments for peptide synthesis and comparison with peptides rendered by *in silico* elastase digestion

**Figure S1:** Fibrils formed from bulk S-protein peptide library

**Figure S2:** Structural context of the Spike peptides

**Figure S3:** Fibrillation of mix of the seven Spike peptides

**Figure S4:** Thermal denaturation by DSF

**Figure S5:** Raw transmission electron micrographs of full-length SARS-CoV-2 S-protein, Neutrophil Elastase and S-protein + Neutrophil Elastase incubated at 37 °C for 24h

**Figure S6:** *In silico* mutation of one amino acid in the amyloidogenic segment in Spike192

**Figure S7:** Fluorescence micrographs and spectra of Spike192 fibrils stained with fluorescent analogs of amyloid PET tracers

**Figure S8:** WALTZ amyloidogenic sequence predictions of S-protein sequences from seven corona viruses known to infect humans

**Table S1:** S-protein peptides formed by elastase cleavage 1 min vs 6 h by LC-MS/MS (separate excel file)

**Table S2:** Quantification of abundant S-peptide peaks by LC-MS/MS (separate excel file)

## Supporting Methods

### Solubilization and fibrillation of bulk peptide library

A bulk library of 15-mer peptides with 11 amino acid overlap was purchased from GenScript, Netherlands (cat no catalog no RP30020), (Supporting information). The peptides were delivered as lyophilized powder in two subpools. Each subpool was treated separately as follows.

The lyophilized powder was reconstituted in autoclaved, ice-cold PBS (0.14 M NaCl, 0.0027 M KCl, 0.01 M  $\text{PO}_4^{3-}$  (Medicago)) to a total concentration of 2 mg/ml peptide mixture (~12  $\mu\text{g}/\text{ml}$  per peptide) and subsequently sonicated in water bath for 15 minutes. The resulting turbid mixture was transferred to centrifugation microtube and spun at 20 000 g at 4 °C for 20 minutes. The supernatant (hereafter called soluble fraction) was transferred to a fresh tube and the pellet was supplemented with hexafluoroisopropanol (HFIP) at a volume corresponding to 10 % of the initially added PBS (Hereafter called insoluble fraction). This resulted in a clear solution.

The soluble fraction was supplemented with 10% HFIP to match HFIP concentration on the insoluble fraction. PBS was added to the insoluble fraction to reach a final concentration of 10% HFIP. 400  $\mu\text{l}$  of each of the four preparations were aliquoted to tightly sealed glass vials and placed at 37 °C for 24 hours.

### Selection of amyloid prone segments

Custom made peptides were selected from the full-length SARS-CoV-2 spike protein (protein ID: P0DTC2) with the aim to generate amyloid prone peptides. The primary sequence of the protein was subjected to the WALTZ algorithm (<https://waltz.switchlab.org/>) [1]. The algorithm was set to High selectivity to avoid false positives. The algorithm predicted 7 amyloidogenic sequences comprising 5-9 amino acids respectively (supporting information). The WALTZ predicted sequence was placed in the middle and flanking amino acids were selected to include hydrophobic and exclude charged residues. The peptides were named based on the number of the first amino acid in the respective sequence. Based on this information we selected peptides stretching over 20 amino acids. Due to solubility issues for some peptides, charged residues were reincluded and in some instances (Spike365 and Spike685) additional lysines and glycines were included to generate producible peptides. Spike258 was produced with 21 amino acids to allow for both the N-terminal tryptophan and the C-terminal lysine to be included.

AlphaFold2[2] was performed on the selected peptides to predict structure as free peptides. Three peptides: Spike258, Spike365 and Spike685, that are in  $\beta$ -strand conformation in the full-length protein are in helical conformation as free peptides (Figure S2B). One of the peptides (Spike601) was predicted by AlphaFold2 to be random coil and Spike1166 was predicted to be an  $\alpha$ -helix. Spike365 and Spike685 have been N-terminally modified with solubilizing sequences to enable production. AlphaFold2 was performed on the sequences in Table 1.

### Solubilization and fibrillation of custom-made peptides

Custom-made peptides (main text Table 1) were delivered from GenScript, Netherlands as lyophilized powder. 100% HFIP was added to each peptide to reach a final peptide concentration of 10 mg/ml. The vials were sonicated in water bath for 15 minutes and subsequently frozen at -20 °C until needed.

On day of fibrillation, the solubilized peptides were thawed at room temperature and diluted in HFIP to reach a peptide concentration of 1 mg/ml and sonicated in water bath 15 minutes. Triplicate samples for each peptide were prepared by adding HFIP solubilized peptide to ice cold phosphate buffered saline (PBS) pH 7.4, supplemented with ThT to reach a final concentration of 0.1 mg/ml

peptide, 2  $\mu\text{M}$  ThT and 10% HFIP. MALDI-ToF mass spectra were collected on the dissolved peptides to verify purity (Figure S2C) Peptides at a concentration of 0.1 mg/ml dissolved in PBS was mixed 50/50 with alpha-Cyano-4-hydroxycinnamic acid matrix and were analyzed by UltrafleXtreme MALDI system (Bruker Daltonics, Bremen, Germany).

A mixture of all peptides was also prepared by mixing equal volumes of each peptide preparation. This renders a total peptide concentration of 0.1 mg/ml and a concentration of 0.014 mg/ml of each constituting peptide. The samples were distributed in 96-well black untreated half area plates with transparent bottom (Corning costar 3880) placed on a bed of ice. The plate was firmly sealed with aluminum and plastic sealing film to prevent evaporation of HFIP. The plate was placed at 37 °C in a Tecan Infinite M1000 Pro plate reader with linear shaking between measurements with amplitude 2 mm and frequency 654 rpm. ThT intensity was monitored by bottom read mode with excitation at 440 nm and emission at 500 nm every 5 minutes for 24 hours. The mixture of peptides resulted in amyloid fibril formation with sigmoidal ThT kinetics suggesting a nucleation dependent mechanism (Figure S3A). The fibril morphology from the mixture (Figure S3B) most closely resembled that of fibrils composed of the well-ordered Spike192 (cf. Figure S3B; Figure S3C), suggesting that this peptide is dominating the fibril structures in the mixture.

Corresponding samples but with ThT omitted was also included on the plate for upstream experiments (below referred to as unstained reactions).

#### **Transmission electron microscopy**

TEM grids from each of the samples were prepared from the unstained fibrillation reactions as follows: Five  $\mu\text{L}$  of samples were placed on carbon coated copper grids (Carbon-B, Ted Pella Inc.) and were incubated for 2 minutes. Excessive salt was removed with one wash of 5  $\mu\text{L}$  deionized water and grids were negatively stained with 2% uranyl acetate for 30 s. Grids were blotted dry and air dried overnight.

Transmission electron microscopy (TEM) imaging was performed using a Jeol JEM1400 Flash TEM microscope operating at 80 kV (Main text Figure 1, 2, 4, Figure S1, Figure S3, and Figure S5).

#### **Congo red birefringence**

Aliquots from the unstained fibrillation reactions were prepared for evaluation of Congo red birefringence as follows: Five  $\mu\text{L}$  of Congo red stock solution (100  $\mu\text{M}$  in milliQ water) was added to 45  $\mu\text{L}$  of 0.1 mg/ml Spike-peptide fibrils in solution resulting in a molar ratio of Spike-peptide:dye 4:1. Stained fibrils were left to self-sediment over-night at 20 °C. 5  $\mu\text{L}$  from the bottom of the pelleted samples were transferred to superfrost gold glass slides (Thermo Fisher, Walldorf, Germany) and allowed to dry. The dried droplets were covered with fluorescence mounting medium (Dako, Glosrup, Denmark). Congo red stained samples were analyzed using a Nikon light microscope equipped with polarizers for both incoming light and in front of the detector (Main text Figure 1 and 5).

#### **Elastase digestion of full-length S-protein**

Full-length wild-type SARS-CoV-2 S-protein (protein ID: PODTC2) expressed in human HEK293 cells (Sigma-Aldrich catalogue # AGX819) was subjected to proteolytic cleavage by Human elastase expressed in human leucocytes (Sigma-Aldrich, catalogue # 324681) as follows:

The S-protein was delivered in Tris buffer pH 8 at a concentration of 5.8  $\mu\text{M}$  (on a monomer basis). Elastase was delivered as lyophilized powder and was reconstituted in 10 mM Tris-HCl pH 8.4 (Tris-buffer) to a final concentration of 13.5  $\mu\text{M}$ . Three sample types were prepared; 1 Spike diluted 1:1 in Tris-buffer; 2 Elastase diluted 1:1 in Tris buffer; 3 Spike and Elastase stocks mixed 1:1. All samples

were incubated at 37 °C for 24 hours. After 24 hours PMSF was added to all samples to a final concentration of 1 mM. TEM grids were prepared, and TEM analysis was performed as described above.

### **Thermal stability of elastase digested S-protein**

Thermal unfolding and refolding of SARS-CoV-2 S-protein, monitored by spectral shift due to tryptophan exposure, in the presence or absence of elastase was assayed to verify folded protein from initiation and lack of refolding if nicking by proteolysis of S-protein was occurring. Samples were prepared with recombinant full-length SARS-CoV-2 S-protein 1  $\mu$ M on a monomer basis (S-protein contains 12 Trp per monomer) in the presence or absence of neutrophil elastase 2.5  $\mu$ M (3 Trp). Elastase alone was also assayed for comparison. All samples were prepared in 10 mM Tris-HCl buffer pH 8.4. Thermal stability scan was initiated 15 min after mixing of samples at 20 °C. Analysis was performed by Trp fluorescence by nanoscale differential fluorimetry (350nm/330 nm emission ratio) using the Prometehus NT-48 instrumentation (Nanotemper). Settings: Thermal scan, 1 °C/min, 20-110 °C for unfolding and followed by refolding at 1 °C/min (Main text Figure 2, Figure S4).

### **Mass spectrometry of elastase digested S-protein**

Samples from the same reactions as for DSF were incubated in parallel at 37 °C for 6 h prior to preparation of samples for mass spectrometry. The reaction was stopped by mixing with equal volumes of 6 M GuHCl, 0.2 % TFA to a final concentration of 3 M GuHCl and 0.1% TFA. Samples were Zip-tipped using C4 and C18 Zip-tips respectively as described by the manufacturer (Millipore). Peptides isolated by C18 were mixed 50/50 with alpha-Cyano-4-hydroxycinnamic acid matrix and protein samples zip tipped with C4 were mixed with sinapinic acid as matrix for MALDI-ToF. Protein mass spectra were acquired on an UltrafleXtreme MALDI-TOF mass spectrometer (Bruker Daltonics Bremen Germany) instrument operated in the linear positive ion mode with flexControl software (Version 3.4, Bruker Daltonics). The MS spectra obtained were analyzed using flexAnalysis software (Version 3.4, Bruker Daltonics) (Main text Figure 2). No peaks were recovered above 50000 Da from the acquired spectra even for C4 isolated proteins. Elastase, where added, showed a peak with a centroid at 27100  $\pm$  3 Da.

### **LC-MS/MS and peptide identification**

The S-protein at a final concentration of 1.45  $\mu$ M (on a monomer basis) was co-incubated with elastase at a final concentration of 2.7  $\mu$ M in 10 mM Tris-HCl pH 8.4 (Tris-buffer) for 1 min or 6 h at 37 °C. Undigested S-protein was run as a control to check for possible *in vitro* degradation peptides. The reaction was stopped by mixing with equal volumes of 6 M GuHCl, 0.2 % TFA to a final concentration of 3 M GuHCl and 0.1% TFA. Samples were desalted using Ziptips C18 as described by the manufacturer (Millipore). Samples were eluted using 50% and 70% acetonitrile with 0.1 % TFA and vacuum dried using Speedvac concentrator (Thermo Scientific Savant).

The samples were redissolved in 0.1% formic acid in milli-Q water and were applied to an EASY-nanoLC II system (Thermo Fisher Scientific) with a C18 reverse chromatography column 20 mm  $\times$  100  $\mu$ m C18 pre column followed by a 100 mm  $\times$  75  $\mu$ m C18 column with particle size 5  $\mu$ m (NanoSeparations, Nieuwkoop, Netherlands) and peptides were separated at a flow rate of 300 nL/min by a gradient of 0.1% formic acid in water (A) and 0.1% formic acid in acetonitrile (B) as follows: from 2% B to 30% B in 60 minutes; from 30% B to 100% B in 60 minutes.

Automated online analyses were performed in positive mode by LTQ Orbitrap Velos Pro hybrid mass spectrometer (Thermo Scientific) equipped with a nano-electrospray source with Xcalibur software (v.2.6, Thermo Scientific). Full MS scans were collected with a range of 350–1800  $m/z$ , a resolution of 30 000 ( $m/z$  200), the top 20 most intense multiple charged ions were selected with an isolation window

of 2.0 and fragmented in the linear ion trap by collision-induced dissociation with normalized collision energy of 35%. Dynamic exclusion was enabled ensuring peaks selected for fragmentation were excluded for 60 s.

Peptides were identified using using Sequest HT in Proteome Discoverer (Thermo Fisher Scientific, San Jose, CA version 2.5.0.400) and the cRAP database ([cRAP protein sequences \(thegpm.org\)](http://cRAP.protein.sequences.thegpm.org)) merged with - P0DTC2 sequence for the SARS-CoV-2 S-protein (UniProtKB). and elastase cleavage prediction for peptide identification allowing missed cleavage sites. The following search parameters were used: elastase as a digestion enzyme; maximum number of missed cleavages 8; fragment ion mass tolerance 0.10 Da; parent ion mass tolerance 15.0 ppm.

SARS-CoV-2 S-protein peptides were quantified using two methods: peak intensity and spectral counts. Based on this, abundances of peptides originating from SARS-CoV-2 S-protein were compared for the 3 S-protein samples: undigested, incubated for 1 min with elastase, incubated for 6 h with elastase (Table S1 and Table S2).

### **Fibrin formation and fibrinolysis**

Formation of fibrin from fibrinogen and subsequent fibrinolysis was monitored in Tecan Infinite M1000 Pro plate reader in Corning Costar non-binding half area plates 3881 by measuring turbidity increase and decrease with absorbance at 350 nm. The experiments were performed at 37 °C [3].

Human fibrinogen (plasminogen free) purified from human plasma (Merck) at a final concentration of 0,5 mg/ml in fibrin buffer (20 mM Hepes pH 7.4, 120 mM NaCl, 1 mM CaCl<sub>2</sub>) was used in 200 µl per well. Amyloids formed from the mix of seven spike peptides was added to the fibrinogen to a final concentration of 10 µg/ml and buffer with corresponding volume of HFIP as the fibril preparations as result of solubilization of the peptides was used as control. Fibrin formation was induced by activation with 0,1 U/µl Thrombin (Sigma). When equilibrium was reached after 120 minutes, the plate was ejected from the plate reader. Fibrin clots were observed in all wells where both fibrinogen and thrombin had been added. Fibrinolysis was induced by adding plasminogen from human serum (Sigma) and its activator human tissue plasminogen activator (tPA) (Sigma) at a final concentration of 0.5 µM and 1.2 nM respectively. The fibrinolysis was again monitored by A350 to detect decrease in turbidity as the fibrin clot was digested by plasmin (Main text Figure 4C).

To explore the effect of individual spike peptide amyloid fibrils, the experiment was repeated but using spike amyloid generated from pure preparations of spike192 and spike194-203 respectively. Spike amyloid was added to the reaction at a final concentration of 20 µg/ml and 150 µl total volume was used in each well. For each individual reaction (10-12 replicates), the average of three sample specific control samples with fibrinogen and the respective spike amyloid or HFIP control, but without thrombin, were subtracted. The difference in turbidity between point of fibrin formation equilibrium at 120 minutes and fibrinolysis equilibrium at 270 minutes were calculated (Main text Figure 4D).

### **Staining with fluorescent PET amyloid ligand analogues CN-PiB and DF-9**

Unstained fibrils of Spike192 formed at 1 mg/ml was diluted to 0.1 mg/ml in PBS buffer pH 7.4 and were stained with a final concentration of 1 µM CN-PiB or DF-9 over night. 3 µl from the bottom of the sedimented samples were transferred to superfrost gold glass slides (Thermo Fisher, Walldorf, Germany) and allowed to dry. The dried droplets were covered with fluorescence mounting medium (Dako, Glostrup, Denmark). Stained samples were analyzed using a Leica600DM epifluorescence microscope equipped with long band pass filters and a hyperspectral camera (SpectraCube, ASI, Israel). Settings: excitation 350 nm emission 400-700 nm, 25 ms exposure, 20x objective. (Figure S7).

## Supporting information: Bulk S-protein peptide library sequences

Marked in yellow are peptides marked as amyloidogenic based on WALTZ “best overall performance” settings [1].

Red letters were indicated as amyloidogenic with WALTZ “high specificity” settings.

### Subpool 1

|                     |                   |                      |                  |
|---------------------|-------------------|----------------------|------------------|
| SARS-CoV-2 Spike_1  | MFVFLVLLPLVSSQC   | SARS-CoV-2 Spike_77  | SFTVEKGIYQTSNFR  |
| SARS-CoV-2 Spike_2  | LVLLPLVSSQCVNLT   | SARS-CoV-2 Spike_78  | EKGIYQTSNFRVQPT  |
| SARS-CoV-2 Spike_3  | PLVSSQCVNLTTRTQ   | SARS-CoV-2 Spike_79  | YQTSNFRVQPTESIV  |
| SARS-CoV-2 Spike_4  | SQCVNLTTRTQLPPA   | SARS-CoV-2 Spike_80  | NFRVQPTESIVRFPN  |
| SARS-CoV-2 Spike_5  | NLTTRTQLPPAYTNS   | SARS-CoV-2 Spike_81  | QPTESIVRFPNITNL  |
| SARS-CoV-2 Spike_6  | RTQLPPAYTNSFTRG   | SARS-CoV-2 Spike_82  | SIVRFPNITNLCFFG  |
| SARS-CoV-2 Spike_7  | PPAYTNSFTRGVYYP   | SARS-CoV-2 Spike_83  | FPNITNLCFFGEVFN  |
| SARS-CoV-2 Spike_8  | TNSFTRGVYYPDKVF   | SARS-CoV-2 Spike_84  | TNLCFFGEVFNATRF  |
| SARS-CoV-2 Spike_9  | TRGVYYPDKVFRSSV   | SARS-CoV-2 Spike_85  | PFGEVFNATRFASVY  |
| SARS-CoV-2 Spike_10 | YYPDKVFRSSVLHST   | SARS-CoV-2 Spike_86  | VFNATRFASVYAWNR  |
| SARS-CoV-2 Spike_11 | KVFRSSVLHSTQDLF   | SARS-CoV-2 Spike_87  | TRFASVYAWNRKRIS  |
| SARS-CoV-2 Spike_12 | SSVLHSTQDLFLPFF   | SARS-CoV-2 Spike_88  | SVYAWNRKRISNCSVA |
| SARS-CoV-2 Spike_13 | HSTQDLFLPFFSNVT   | SARS-CoV-2 Spike_89  | WNRKRISNCSVADYSV |
| SARS-CoV-2 Spike_14 | DLFLPFFSNVTFWHA   | SARS-CoV-2 Spike_90  | RISNCSVADYSVLYNS |
| SARS-CoV-2 Spike_15 | PFFSNVTFWHAHVS    | SARS-CoV-2 Spike_91  | CVADYSVLYNSASFS  |
| SARS-CoV-2 Spike_16 | NVTWFHAHVSNGTNG   | SARS-CoV-2 Spike_92  | YVLYNSASFSFTFKC  |
| SARS-CoV-2 Spike_17 | FHAHVSNGTNGTKRF   | SARS-CoV-2 Spike_93  | YNSASFSFTFKCYGVS |
| SARS-CoV-2 Spike_18 | HVSGTNGTKRFDNPV   | SARS-CoV-2 Spike_94  | SFSTFKCYGVSPTKL  |
| SARS-CoV-2 Spike_19 | TNGTKRFDNPVLPFN   | SARS-CoV-2 Spike_95  | FKCYGVSPTKLNLDLC |
| SARS-CoV-2 Spike_20 | KRFDNPVLPFNDGVY   | SARS-CoV-2 Spike_96  | GVSPKLNLDLCFTNV  |
| SARS-CoV-2 Spike_21 | NPVLPFNDGVYFAST   | SARS-CoV-2 Spike_97  | TKLNLDLCFTNVYADS |
| SARS-CoV-2 Spike_22 | PFNDGVYFASTEKSN   | SARS-CoV-2 Spike_98  | DLCFNTVYADSFVIR  |
| SARS-CoV-2 Spike_23 | GVYFASTEKSNIRG    | SARS-CoV-2 Spike_99  | TNVYADSFVIRGDEV  |
| SARS-CoV-2 Spike_24 | ASTEKSNIRGWIFG    | SARS-CoV-2 Spike_100 | ADSFVIRGDEVQRQIA |
| SARS-CoV-2 Spike_25 | KSNIRGWIFGTTLD    | SARS-CoV-2 Spike_101 | VIRGDEVQRQIAPGQT |
| SARS-CoV-2 Spike_26 | IRGWIFGTTLDLSDKTQ | SARS-CoV-2 Spike_102 | DEVQRQIAPGQTGKIA |
| SARS-CoV-2 Spike_27 | IFGTTLDLSDKTQSLLI | SARS-CoV-2 Spike_103 | QIAPGQTGKIADYNY  |
| SARS-CoV-2 Spike_28 | TLDSKTQSLLIIVNNA  | SARS-CoV-2 Spike_104 | QGTGKIADYNYKLPD  |
| SARS-CoV-2 Spike_29 | KTQSLLIIVNNAATNVV | SARS-CoV-2 Spike_105 | KIADYNYKLPDDFTG  |
| SARS-CoV-2 Spike_30 | LLIVNNAATNVVIVKVC | SARS-CoV-2 Spike_106 | YNYKLPDDFTGCVIA  |
| SARS-CoV-2 Spike_31 | NNATNVVIVKVCFFQF  | SARS-CoV-2 Spike_107 | LPDDFTGCVIAWNSN  |
| SARS-CoV-2 Spike_32 | NVVIKVCFFQFCNDP   | SARS-CoV-2 Spike_108 | FTGCVIAWNSNLDL   |
| SARS-CoV-2 Spike_33 | KVCEFCFCNDPFLGV   | SARS-CoV-2 Spike_109 | VIAWNSNLDLDSKVG  |
| SARS-CoV-2 Spike_34 | FQFCNDPFLGVYHYK   | SARS-CoV-2 Spike_110 | NSNLDLDSKVGNNY   |
| SARS-CoV-2 Spike_35 | NDPFLGVYHYKNNKS   | SARS-CoV-2 Spike_111 | LDSKVGNNYNYLRL   |
| SARS-CoV-2 Spike_36 | LGVYHYKNNKSWMES   | SARS-CoV-2 Spike_112 | VGNNYNYLRLFRKS   |
| SARS-CoV-2 Spike_37 | YHKNKSWMESEFRV    | SARS-CoV-2 Spike_113 | YNYLRLFRKSNLKP   |
| SARS-CoV-2 Spike_38 | NKSWMESEFRVYSSA   | SARS-CoV-2 Spike_114 | YRLFRKSNLKPFRD   |
| SARS-CoV-2 Spike_39 | MESEFRVYSSANCT    | SARS-CoV-2 Spike_115 | RKSNLKPFRDISTE   |
| SARS-CoV-2 Spike_40 | FRVYSSANCTFEYV    | SARS-CoV-2 Spike_116 | LKPFERDISTEYQA   |
| SARS-CoV-2 Spike_41 | SSANCTFEYVQPF     | SARS-CoV-2 Spike_117 | ERDISTEYQAGSTP   |
| SARS-CoV-2 Spike_42 | NCTFEYVQPFPLMD    | SARS-CoV-2 Spike_118 | STETIYQAGSTPCNGV |
| SARS-CoV-2 Spike_43 | EYVSQPFPLMDLEGKQ  | SARS-CoV-2 Spike_119 | YQAGSTPCNGVEGFN  |
| SARS-CoV-2 Spike_44 | QPFPLMDLEGKQGNFR  | SARS-CoV-2 Spike_120 | STPCNGVEGFNCYFP  |
| SARS-CoV-2 Spike_45 | MDLEGKQGNFKNLR    | SARS-CoV-2 Spike_121 | GNVEGFNCYFPQLQSY |
| SARS-CoV-2 Spike_46 | GKQGNFKNLRFEVFK   | SARS-CoV-2 Spike_122 | GFNCYFPQLQSYGFQ  |
| SARS-CoV-2 Spike_47 | NFKNLRFEVFKNIDG   | SARS-CoV-2 Spike_123 | YFPLQSYGFQPTNGV  |
| SARS-CoV-2 Spike_48 | LREFVFKNIDGYFKI   | SARS-CoV-2 Spike_124 | QSYGFQPTNGVGYQP  |
| SARS-CoV-2 Spike_49 | VFKNIDGYFKIYSKH   | SARS-CoV-2 Spike_125 | FQPTNGVGYQPYRVV  |
| SARS-CoV-2 Spike_50 | IDGYFKIYSKHPTPIN  | SARS-CoV-2 Spike_126 | NGVGYQPYRVVLSF   |
| SARS-CoV-2 Spike_51 | FKIYSKHPTINLVRD   | SARS-CoV-2 Spike_127 | YQPYRVVLSFPELLH  |
| SARS-CoV-2 Spike_52 | SKHPTINLVRDLPQG   | SARS-CoV-2 Spike_128 | RVVLSPELLHAPAT   |
| SARS-CoV-2 Spike_53 | PINLVRDLPQGFSAL   | SARS-CoV-2 Spike_129 | LSPELLHAPATVCGP  |
| SARS-CoV-2 Spike_54 | VRDLPQGFSALEPLV   | SARS-CoV-2 Spike_130 | LLHAPATVCGPKKST  |
| SARS-CoV-2 Spike_55 | PQGFSALEPLVDLPI   | SARS-CoV-2 Spike_131 | PATVCGPKKSTNLVK  |
| SARS-CoV-2 Spike_56 | SALEPLVDLPIGINI   | SARS-CoV-2 Spike_132 | CGPKKSTNLVKNCV   |
| SARS-CoV-2 Spike_57 | PLVDLPIGINITRFQ   | SARS-CoV-2 Spike_133 | KSTNLVKNKCVNENE  |
| SARS-CoV-2 Spike_58 | LPIGINITRFQTLA    | SARS-CoV-2 Spike_134 | LVKNKCVNENFNLGLT |
| SARS-CoV-2 Spike_59 | INITRFQTLALHRS    | SARS-CoV-2 Spike_135 | KCVNENFNLGLTGTG  |
| SARS-CoV-2 Spike_60 | RFQTLALHRSYLTP    | SARS-CoV-2 Spike_136 | FNENGLTGTGVLTES  |
| SARS-CoV-2 Spike_61 | LLALHRSYLTPGDSS   | SARS-CoV-2 Spike_137 | GLTGTGVLTESNKKF  |
| SARS-CoV-2 Spike_62 | HRSYLTPGDSSSGWT   | SARS-CoV-2 Spike_138 | TGVLTESNKKFLFPFQ |
| SARS-CoV-2 Spike_63 | LTPGDSSSGWTAGAA   | SARS-CoV-2 Spike_139 | TESNKKFLFPQFGR   |
| SARS-CoV-2 Spike_64 | DSSSGWTAGAAAYYV   | SARS-CoV-2 Spike_140 | KKFLFPQFGRDIAD   |
| SARS-CoV-2 Spike_65 | GWTAGAAAYYVGYLQ   | SARS-CoV-2 Spike_141 | PFQFGRDIADTTDA   |
| SARS-CoV-2 Spike_66 | GAAAYYVGYLQPRTF   | SARS-CoV-2 Spike_142 | FGRDIADTTDAVRDP  |
| SARS-CoV-2 Spike_67 | YVGYLQPRTFLLKY    | SARS-CoV-2 Spike_143 | IADTTDAVRDPQTL   |
| SARS-CoV-2 Spike_68 | YLPQRTFLLKYENNG   | SARS-CoV-2 Spike_144 | TDVRDPQTLLEILDI  |
| SARS-CoV-2 Spike_69 | RTFLLKYENNGTITD   | SARS-CoV-2 Spike_145 | RDPQTLLEILDITPCS |
| SARS-CoV-2 Spike_70 | LKYENNGTITDAVDC   | SARS-CoV-2 Spike_146 | TLEILDITPCSFGGV  |
| SARS-CoV-2 Spike_71 | ENGTITDAVDCALDP   | SARS-CoV-2 Spike_147 | LDITPCSFGGVSVIT  |
| SARS-CoV-2 Spike_72 | ITDAVDCALDPLSET   | SARS-CoV-2 Spike_148 | PCSFGGVSVITPGTN  |
| SARS-CoV-2 Spike_73 | VDCALDPLSETKCTL   | SARS-CoV-2 Spike_149 | GGVSVITPGTNTSNQ  |
| SARS-CoV-2 Spike_74 | LDPLSETKCTLKSFT   | SARS-CoV-2 Spike_150 | VITPGTNTSNQVAVL  |
| SARS-CoV-2 Spike_75 | SETKCTLKSFTVEKG   | SARS-CoV-2 Spike_151 | GTNTSNQVAVLYQDV  |
| SARS-CoV-2 Spike_76 | CTLKSFTVEKGIYQT   | SARS-CoV-2 Spike_152 | SNQVAVLYQDVNCTE  |
|                     |                   | SARS-CoV-2 Spike_153 | AVLYQDVNCTEVEFVA |

SARS-CoV-2 Spike\_154  
SARS-CoV-2 Spike\_155  
SARS-CoV-2 Spike\_156  
SARS-CoV-2 Spike\_157  
SARS-CoV-2 Spike\_158

QDVNCTEVPVAIHAD  
CTEVPVAIHADQLTP  
PVAIHADQLTPTWRV  
HADQLTPTWRVYSTG  
LTPTRWRVYSTGSNVF

SARS-CoV-2 Spike\_235  
SARS-CoV-2 Spike\_236  
SARS-CoV-2 Spike\_237  
SARS-CoV-2 Spike\_238  
SARS-CoV-2 Spike\_239  
SARS-CoV-2 Spike\_240  
SARS-CoV-2 Spike\_241  
SARS-CoV-2 Spike\_242  
SARS-CoV-2 Spike\_243  
SARS-CoV-2 Spike\_244  
SARS-CoV-2 Spike\_245  
SARS-CoV-2 Spike\_246  
SARS-CoV-2 Spike\_247  
SARS-CoV-2 Spike\_248  
SARS-CoV-2 Spike\_249  
SARS-CoV-2 Spike\_250  
SARS-CoV-2 Spike\_251  
SARS-CoV-2 Spike\_252  
SARS-CoV-2 Spike\_253  
SARS-CoV-2 Spike\_254  
SARS-CoV-2 Spike\_255  
SARS-CoV-2 Spike\_256  
SARS-CoV-2 Spike\_257  
SARS-CoV-2 Spike\_258  
SARS-CoV-2 Spike\_259  
SARS-CoV-2 Spike\_260  
SARS-CoV-2 Spike\_261  
SARS-CoV-2 Spike\_262  
SARS-CoV-2 Spike\_263  
SARS-CoV-2 Spike\_264  
SARS-CoV-2 Spike\_265  
SARS-CoV-2 Spike\_266  
SARS-CoV-2 Spike\_267  
SARS-CoV-2 Spike\_268  
SARS-CoV-2 Spike\_269  
SARS-CoV-2 Spike\_270  
SARS-CoV-2 Spike\_271  
SARS-CoV-2 Spike\_272  
SARS-CoV-2 Spike\_273  
SARS-CoV-2 Spike\_274  
SARS-CoV-2 Spike\_275  
SARS-CoV-2 Spike\_276  
SARS-CoV-2 Spike\_277  
SARS-CoV-2 Spike\_278  
SARS-CoV-2 Spike\_279  
SARS-CoV-2 Spike\_280  
SARS-CoV-2 Spike\_281  
SARS-CoV-2 Spike\_282  
SARS-CoV-2 Spike\_283  
SARS-CoV-2 Spike\_284  
SARS-CoV-2 Spike\_285  
SARS-CoV-2 Spike\_286  
SARS-CoV-2 Spike\_287  
SARS-CoV-2 Spike\_288  
SARS-CoV-2 Spike\_289  
SARS-CoV-2 Spike\_290  
SARS-CoV-2 Spike\_291  
SARS-CoV-2 Spike\_292  
SARS-CoV-2 Spike\_293  
SARS-CoV-2 Spike\_294  
SARS-CoV-2 Spike\_295  
SARS-CoV-2 Spike\_296  
SARS-CoV-2 Spike\_297  
SARS-CoV-2 Spike\_298  
SARS-CoV-2 Spike\_299  
SARS-CoV-2 Spike\_300  
SARS-CoV-2 Spike\_301  
SARS-CoV-2 Spike\_302  
SARS-CoV-2 Spike\_303  
SARS-CoV-2 Spike\_304  
SARS-CoV-2 Spike\_305  
SARS-CoV-2 Spike\_306  
SARS-CoV-2 Spike\_307  
SARS-CoV-2 Spike\_308  
SARS-CoV-2 Spike\_309  
SARS-CoV-2 Spike\_310  
SARS-CoV-2 Spike\_311  
SARS-CoV-2 Spike\_312  
SARS-CoV-2 Spike\_313  
SARS-CoV-2 Spike\_314  
SARS-CoV-2 Spike\_315  
SARS-CoV-2 Spike\_316

SLSSSTASALGKQLQDV  
TASALGKQLQDVVNQN  
LGKQLQDVVNQNAQAL  
QDVVNQNAQALNLT  
NQNQAALNLTVKQLS  
QALNLTVKQLSSNFG  
TLVKQLSSNFGAISS  
QLSSNFGAISVNLND  
NFGAISVNLNDILSR  
ISSVNLNDILSRDLKV  
LNDILSRDLKVEAEV  
LSRLDKVEAEVQIDR  
DKVEAEVQIDRLITG  
AEVQIDRLITGRLQS  
IDRLITGRLQSLQTY  
ITGRLQSLQTYVYVQ  
LQSLQTYVYVQQLIRA  
QTYVYVQQLIRAEIR  
TQQLIRAEIRASAN  
IRAEIRASANLAAT  
EIRASANLAATKMSE  
SANLAATKMSECVLG  
AATKMSECVLGGQSKR  
MSECVLGGQSKRVDFC  
VLGGQSKRVDFCGKGY  
SKRVDFCGKGYHLM  
DFCGKGYHLMSPQS  
KGYHLMSPQSPHFG  
LMSFPQSPHFGVFL  
PQSPHFGVFLHVTY  
PHGVFLHVTYVPAQ  
VFLHVTYVPAQEKNF  
VTVYVPAQEKNFITAP  
PAQEKNFITAPAI  
KNFTTAPAI  
TAPAI  
ICHDKAHFPREGV  
GKAHFPREGVFSNG  
FPREGVFSNGTHWF  
GVFVSNGTHWVFTQR  
SNGTHWVFTQRNFYE  
HWVFTQRNFYEPQII  
TQRNFYEPQIIITDN  
FYEPQIIITDNTFVS  
QIIITDNTFVSGNCD  
TDNTFVSGNCDVVI  
FVSGNCDVVI  
NCDVVI  
VIGVNNTVYDPLQ  
VNNTVYDPLQPELDS  
VYDPLQPELDSFKEE  
LQPELDSFKEEELDKY  
LDSFKEEELDKYFKNH  
KEELDKYFKNHSPD  
DKYFKNHSPD  
KNHSPD  
SPD  
DLGDISGINASV  
ISGINASVNIQKEI  
NASVNIQKEIDRLN  
VNIQKEIDRLNEVAK  
KEIDRLNEVAKNLNE  
RLNEVAKNLNESLID  
VAKNLNESLIDLQEL  
LNESLIDLQELGKYE  
LIDLQELGKYEYQYIK  
QELGKYEYQYIKWPY  
KYEYQYIKWPYIWL  
YIKWPYIWLGFIA  
PWIWLGFIAGLIAI  
WLGFIAGLIAIVM  
IAGLIAIVMVTIMLC  
IAIVMVTIMLCMTS  
MVTIMLCMTSCCSC  
MLCMTSCCSCCLGKC  
MTSCCCLGKCCSCG  
CCLGKCCSCGCK  
KCCSCGCKCFDE  
SCGCKCFDEDDSE  
CKCFDEDDSEPV  
DEDDSEPVLGKVLH  
SEPVLGKVLHHT

**Subpool 2**

SARS-CoV-2 Spike\_159  
SARS-CoV-2 Spike\_160  
SARS-CoV-2 Spike\_161  
SARS-CoV-2 Spike\_162  
SARS-CoV-2 Spike\_163  
SARS-CoV-2 Spike\_164  
SARS-CoV-2 Spike\_165  
SARS-CoV-2 Spike\_166  
SARS-CoV-2 Spike\_167  
SARS-CoV-2 Spike\_168  
SARS-CoV-2 Spike\_169  
SARS-CoV-2 Spike\_170  
SARS-CoV-2 Spike\_171  
SARS-CoV-2 Spike\_172  
SARS-CoV-2 Spike\_173  
SARS-CoV-2 Spike\_174  
SARS-CoV-2 Spike\_175  
SARS-CoV-2 Spike\_176  
SARS-CoV-2 Spike\_177  
SARS-CoV-2 Spike\_178  
SARS-CoV-2 Spike\_179  
SARS-CoV-2 Spike\_180  
SARS-CoV-2 Spike\_181  
SARS-CoV-2 Spike\_182  
SARS-CoV-2 Spike\_183  
SARS-CoV-2 Spike\_184  
SARS-CoV-2 Spike\_185  
SARS-CoV-2 Spike\_186  
SARS-CoV-2 Spike\_187  
SARS-CoV-2 Spike\_188  
SARS-CoV-2 Spike\_189  
SARS-CoV-2 Spike\_190  
SARS-CoV-2 Spike\_191  
SARS-CoV-2 Spike\_192  
SARS-CoV-2 Spike\_193  
SARS-CoV-2 Spike\_194  
SARS-CoV-2 Spike\_195  
SARS-CoV-2 Spike\_196  
SARS-CoV-2 Spike\_197  
SARS-CoV-2 Spike\_198  
SARS-CoV-2 Spike\_199  
SARS-CoV-2 Spike\_200  
SARS-CoV-2 Spike\_201  
SARS-CoV-2 Spike\_202  
SARS-CoV-2 Spike\_203  
SARS-CoV-2 Spike\_204  
SARS-CoV-2 Spike\_205  
SARS-CoV-2 Spike\_206  
SARS-CoV-2 Spike\_207  
SARS-CoV-2 Spike\_208  
SARS-CoV-2 Spike\_209  
SARS-CoV-2 Spike\_210  
SARS-CoV-2 Spike\_211  
SARS-CoV-2 Spike\_212  
SARS-CoV-2 Spike\_213  
SARS-CoV-2 Spike\_214  
SARS-CoV-2 Spike\_215  
SARS-CoV-2 Spike\_216  
SARS-CoV-2 Spike\_217  
SARS-CoV-2 Spike\_218  
SARS-CoV-2 Spike\_219  
SARS-CoV-2 Spike\_220  
SARS-CoV-2 Spike\_221  
SARS-CoV-2 Spike\_222  
SARS-CoV-2 Spike\_223  
SARS-CoV-2 Spike\_224  
SARS-CoV-2 Spike\_225  
SARS-CoV-2 Spike\_226  
SARS-CoV-2 Spike\_227  
SARS-CoV-2 Spike\_228  
SARS-CoV-2 Spike\_229  
SARS-CoV-2 Spike\_230  
SARS-CoV-2 Spike\_231  
SARS-CoV-2 Spike\_232  
SARS-CoV-2 Spike\_233  
SARS-CoV-2 Spike\_234

WRVYSTGSNVFQTRA  
STGSNVFQTRAGCLI  
NVFQTRAGCLIGAEH  
TRAGCLIGAEHVNNS  
CLIGAEHVNNSYECD  
AEHVNNSYECDIPIG  
NNSYECDIPIGAGIC  
ECDIPIGAGICASYQ  
PIGAGICASYQTQTN  
GICASYQTQTNPRR  
SYQTQTNPRRARSV  
QTNPRRARSVASQS  
PRRARSVASQSIAY  
RSVASQSIAYTMSL  
SQSIAYTMSLGAEN  
IAYTMSLGAENSVAY  
MSLGAENSVAYSNNS  
AENSVAYSNNSIAIP  
VAYSNNSIAIPTNFT  
NNSIAIPTNFTISVT  
AIPNFTISVTTEILL  
NFTISVTTEILLPVSM  
SVTTEILLPVSMTKTS  
EILLPVSMTKTSVDCT  
VSMTKTSVDCTMYIC  
KTSVDCTMYICGDS  
DCTMYICGDSSTEC  
YICGDSSTECNLLQ  
DSTECNLLQYGSF  
SNLLQYGSFCTQLN  
LLQYGSFCTQLNRAL  
GSFCTQLNRALTGIA  
TQLNRALTGIAVEQD  
RALTGIAVEQDKNTQ  
GIAVEQDKNTQEVFA  
EQDKNTQEVFAQVKQ  
NTQEVFAQVKQIYKT  
VFAQVKQIYKTPPIK  
VKQIYKTPPIKDFGG  
YKTPPIKDFGGFNFS  
PIKDFGGFNFSQILP  
FGGFNFSQILPDP  
NFSQILPDPSPKSKR  
ILPDPSPKSKRSFIE  
PSKSKRSFIEDLLF  
SKRSFIEDLLFNKVT  
FIEDLLFNKVTLADA  
LLFNKVTLADAGFIK  
KVTLADAGFIKQYGD  
ADAGFIKQYGDCLGD  
FIKQYGDCLGDIAAR  
YGDCLGDIAARDLIC  
LGDIAARDLICAQKF  
AARDLICAQKFNGLT  
LICAQKFNGLTVLPP  
QKFNGLTVLPLLLTD  
GLTVLPLLLTD  
LPLLLTD  
LTD  
MIAQYTSALLAGTIT  
YTSALLAGTITSGWT  
LLAGTITSGWTFGAG  
TTSGWTFGAGAAALQ  
GWTGAGAAALQIPFA  
GAGAAALQIPFAMQMA  
ALQIPFAMQMA  
PFAMQMA  
QMA  
RFRNGIGVTVNLYEN  
IGVTVNLYENQKLIANQ  
QVLYENQKLIANQFNSAI  
YENQKLIANQFNSAI  
KLIANQFNSAI  
NQFNSAI  
SAIGKIQDSLSTAS  
KIQDSLSTASALGK

## Supporting information: Selection of amyloidogenic segments for peptide synthesis and comparison with peptides rendered by *in silico* elastase digestion

WALTZ prediction “high specificity”, pH 7.0 [1], on SARS-CoV-2 spike protein P0DTC2 indicated with asterisk under the sequence. The synthesized peptide sequences highlighted in colors corresponding to Figure S2A-B. Segments highlighted in grey are peptides predicted to be the result of cleaving with Neutrophil elastase using ExPASy peptide cutter and rendering peptides with 3 or more consecutive amino acids in one of the amyloidogenic regions.

```
>sp|P0DTC2|SPIKE_SARS2
MFVFLVLLPLVSSQCVNLTTRTQLPPAYTNSFTRGVYYPDKVFRSSVLHSTQDLFLPFFS
NVTWFHAIHVSNGTKRFDNPFVDFNDGVYFASTEKSNIRGWIFGTTLDSKTQSLIIV
NNATNVVIVKVEFQFCNDPFLGVYHKNKNSWMESEFRVYSSANNCTFEYVSQPFLMDLE
GKQGNFKNLRE FVFKNIDGYFKIYSKHTPIN LVRDLPQGFSALEPLVDLPIGINITRFQT
                *****
                FKNIDGYFKIYSKHTPINLV
LLALHRSYLTPGDSSSG WTAGAAAYVGYLQPRTEFLK YNENGTITDAVDCALDPLSETK
                *****
                GYLQPRTEFLKYNENGTITDA
CTLKSFTVEKGIYQTSNFRVQPTESIVRFPNITNLCPFGEVFNATRFASVYAWNRKRISN
CVAD YSVLYNSASFSTFK CYGVSPTKLNDLCFTNVYADSFVIRGDEVQRQIAPGQTGKIAD
                *****
                LYNSA
YNYKLPDDFTGCVIAWNSNLDKSVGGNYLYRLEFRKSNLKPFFERDISTEIQAGSTPC
NGVEGFNCYFPLQSYGFQPTNGVGYQPYRVVLSFELLHAPATVCGPKKSTN LVKNKCVN
                *****
                N
FNFNGLTGTGVLTESNKKFLPFQQFGRDIADTTDAVRDPQTLEILDITPCSFGGVSVITP
                *****
                FNFNGLTGTGV
GTNTSNQVAVLYQDVNCTEV PVAIHADQLTPTWRVYSTGSNVFQTRAGCLIGAETHVNNYSY
                *****
                LYQDV
ECDIPIGAGICASYQTQNSPRRAR SVASQSIIAYTMSLGA ENSVAYSNNSIAIPTNFTI
                *****
                SQSIIA
SVTTEILPVSMTKTSVDCTMYICGDSTECNLLLQYGSFCTQLNRALTGIAVEQDKNTQE
VFAQVKQIYKTPPIKDFGGFNFSQILPDPKPSKRSFIEDLLFNKVTLADAGFIKQYGDC
LGDIAARDLICAQKFNGLTVLPLLTDEMIAYTSALLAGTITSGWTFGAGAALQIPFAM
QMAYRFNGIGVTQNVLYENQKLIANQFNSAIGKIQDSLSTASALGKLQDVVNQNAQALN
TLVKQLSSNFGAISSVLNDILSRDKVEAEVQIDRLITGRLQSLQTYVTQQLIRAAEIRA
SANLAATKMSECVLQSKRVDFCGKGYHLMSFPQSAPHGVVFLHVTVVPAQEKNFTTAPA
ICHDKGAHFREGVFSNGTHWFVTQRNFYEPQIITTDNTFVSGNCDVVIGIVNNTVYDP
LQPELDSFKEELDKYFKNHTSPDVD LGDISGINASVVNIQKEIDR LNEVAKNLNESLIDL
                *****
                LGDISGINASVVNIQKEIDR
QELGKYEQYIKWPWYIWLGFIAGLIAIVMVTIMLCCMTSCCSCCKGCCSCGSCCKFDEDD
SEPVLGKVKLHYT
```



**Figure S1: Fibrils formed from bulk S-protein peptide library**

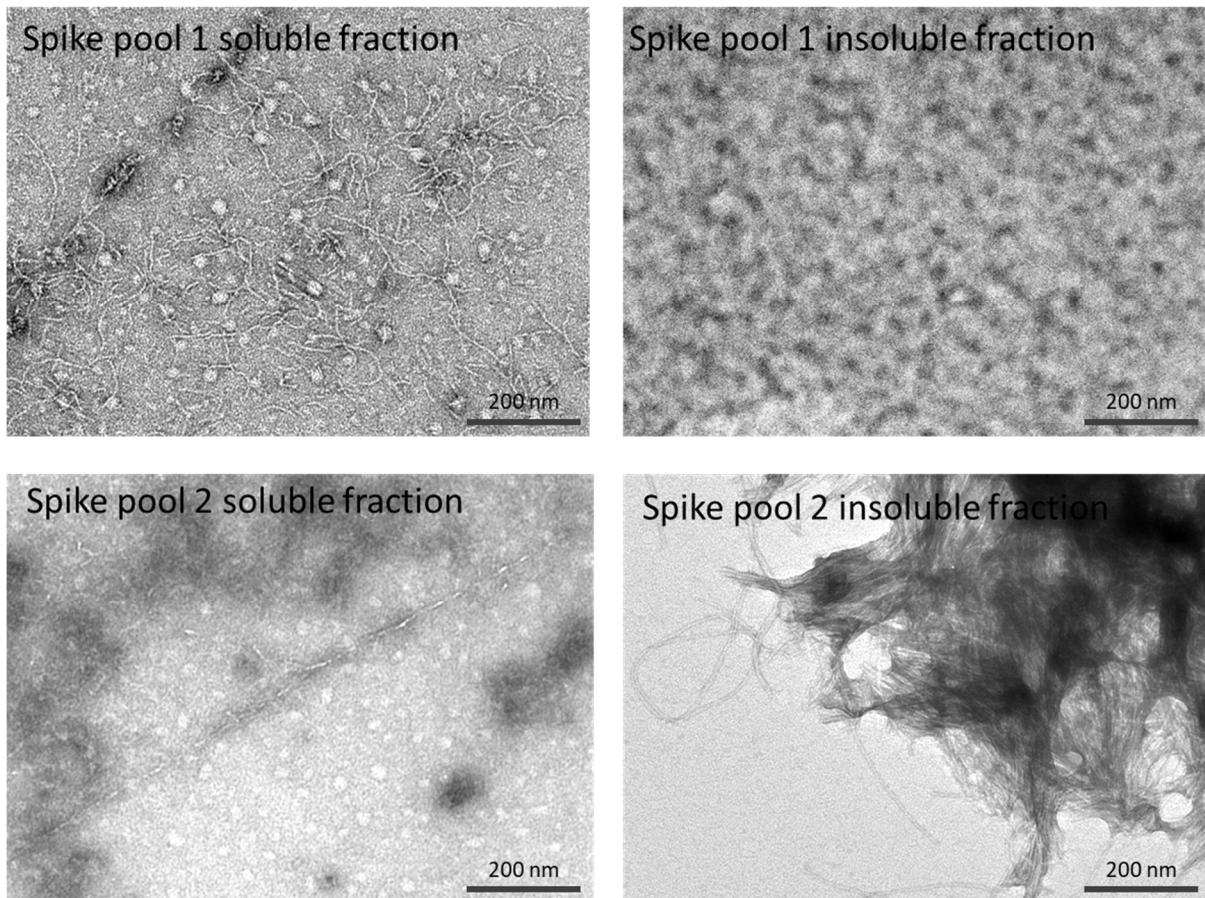

**Figure S1.** Negative stain TEM micrographs of **A.** Long single filament fibrils formed from PBS soluble fraction S-protein peptide library pool 1. **B.** Amorphous aggregates from PBS insoluble fraction S-protein peptide library pool 1. **C.** Short fibrils and amorphous aggregates formed from PBS soluble fraction S-protein peptide library pool 2. **D.** Heavily clustered long fibrils from PBS insoluble fraction S-protein peptide library pool 2.

**Figure S2: Structural context of the Spike peptides**

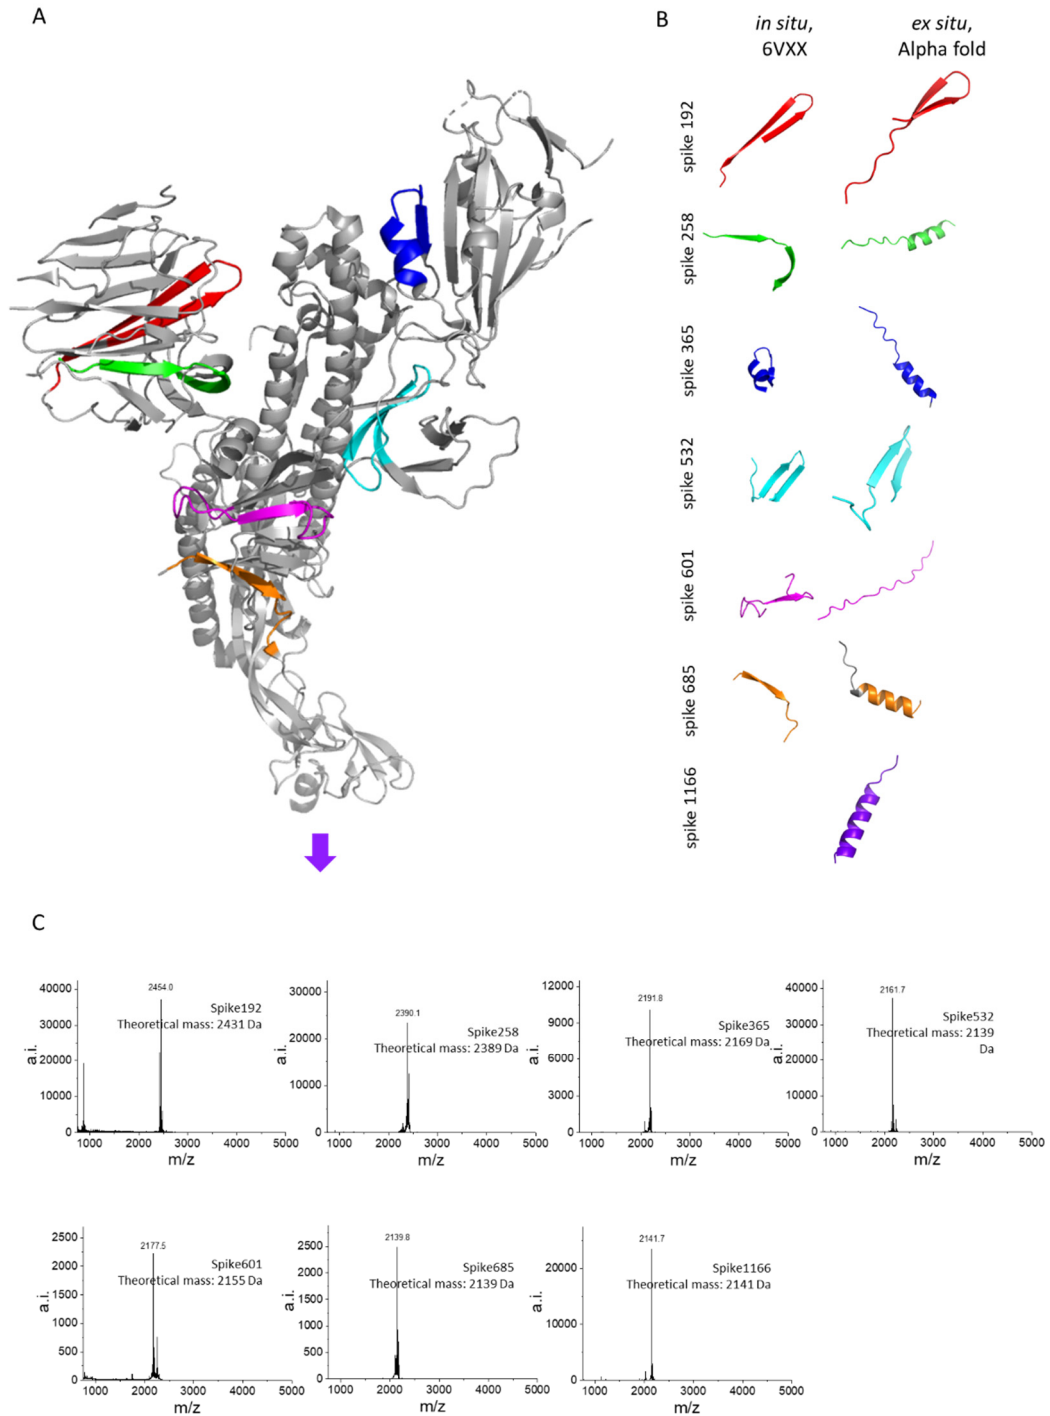

**Figure S2: A.** The structure of one protomer of the trimeric SARS-CoV-2 S-protein in its closed state, PDB code: 6VXX [4] with the predicted full sequence of the amyloidogenic peptides highlighted in the same colors as the predictions in main text Table 1, Figure 3 and Supporting information. **B.** Conformation of peptides within the folded S-protein in comparison with AlphaFold 2 models of the synthetic peptides (sequences as in Table 1). **C.** MALDI-ToF spectra of synthetic peptides dissolved in PBS buffer (10% HFIP) at 0.1 mg/ml to verify sequence and purity. Spike192, Spike365, Spike532, Spike601 show +22 Da due to Na<sup>+</sup> complex formation.

**Figure S3: Fibrillation of mix of the seven Spike peptides**

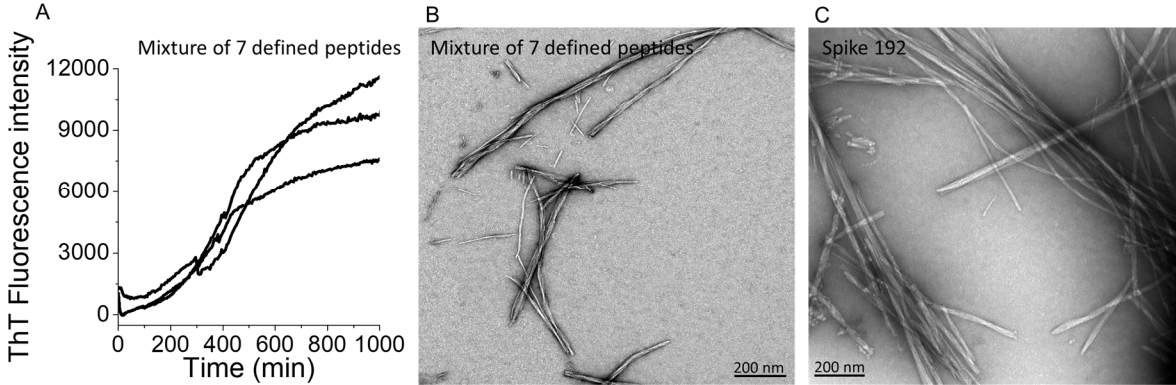

**Figure S3.** Amyloid fibrillation of 7 mixed SARS-CoV-2 S-peptides (total concentration 0.1 mg/ml). **A.** Fibril formation kinetics monitored by ThT fluorescence. **B.** Fibrillar structures by negative stain TEM. **C.** Fibrillar structures by negative stain TEM of Spike192 resembling the mix

**Figure S4: Thermal denaturation by DSF**

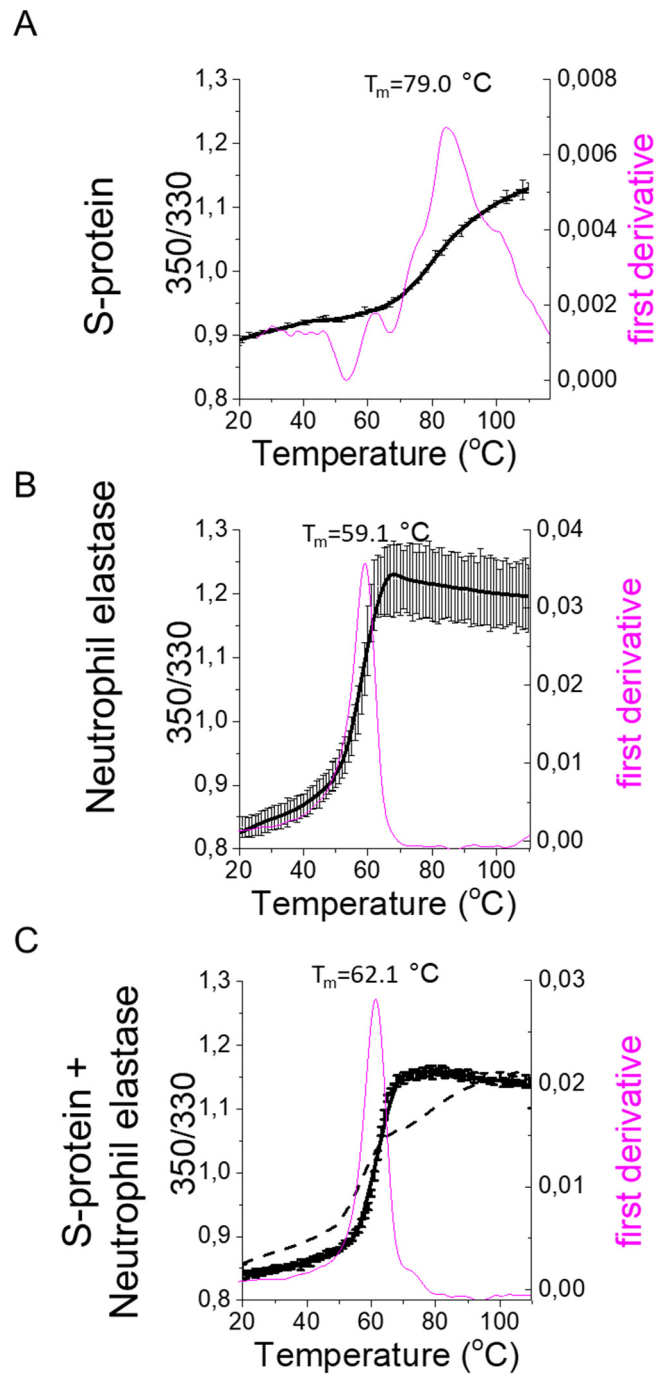

**Figure S4:** Thermal denaturation by differential scanning fluorimetry (DSF) at pH 8.4 of **A)** S-protein **B)** Neutrophil elastase **C)** co-incubation of S-protein and Neutrophil elastase. Black curves show increase in tryptophan exposure to polar environment by emission ratio 350nm/330nm. Data is the average of two separate experiments with standard deviations. The dashed line in **(C)** represents the summed signals from A and B which does not fit the experimental data of the co-incubated proteins indicating S-protein cleavage by elastase. Magenta curve shows the first derivative of the thermal denaturation curve, accentuating the inflection points during denaturation. S-protein (A) in particular, displays a complex denaturation transition, dictated by the dissociation of the trimer as well as unfolding of the different subunits within each monomer.

**Figure S5: Raw transmission electron micrographs of full-length SARS-CoV-2 S-protein, Neutrophil Elastase and S-protein + Neutrophil Elastase incubated at 37 °C for 24h**

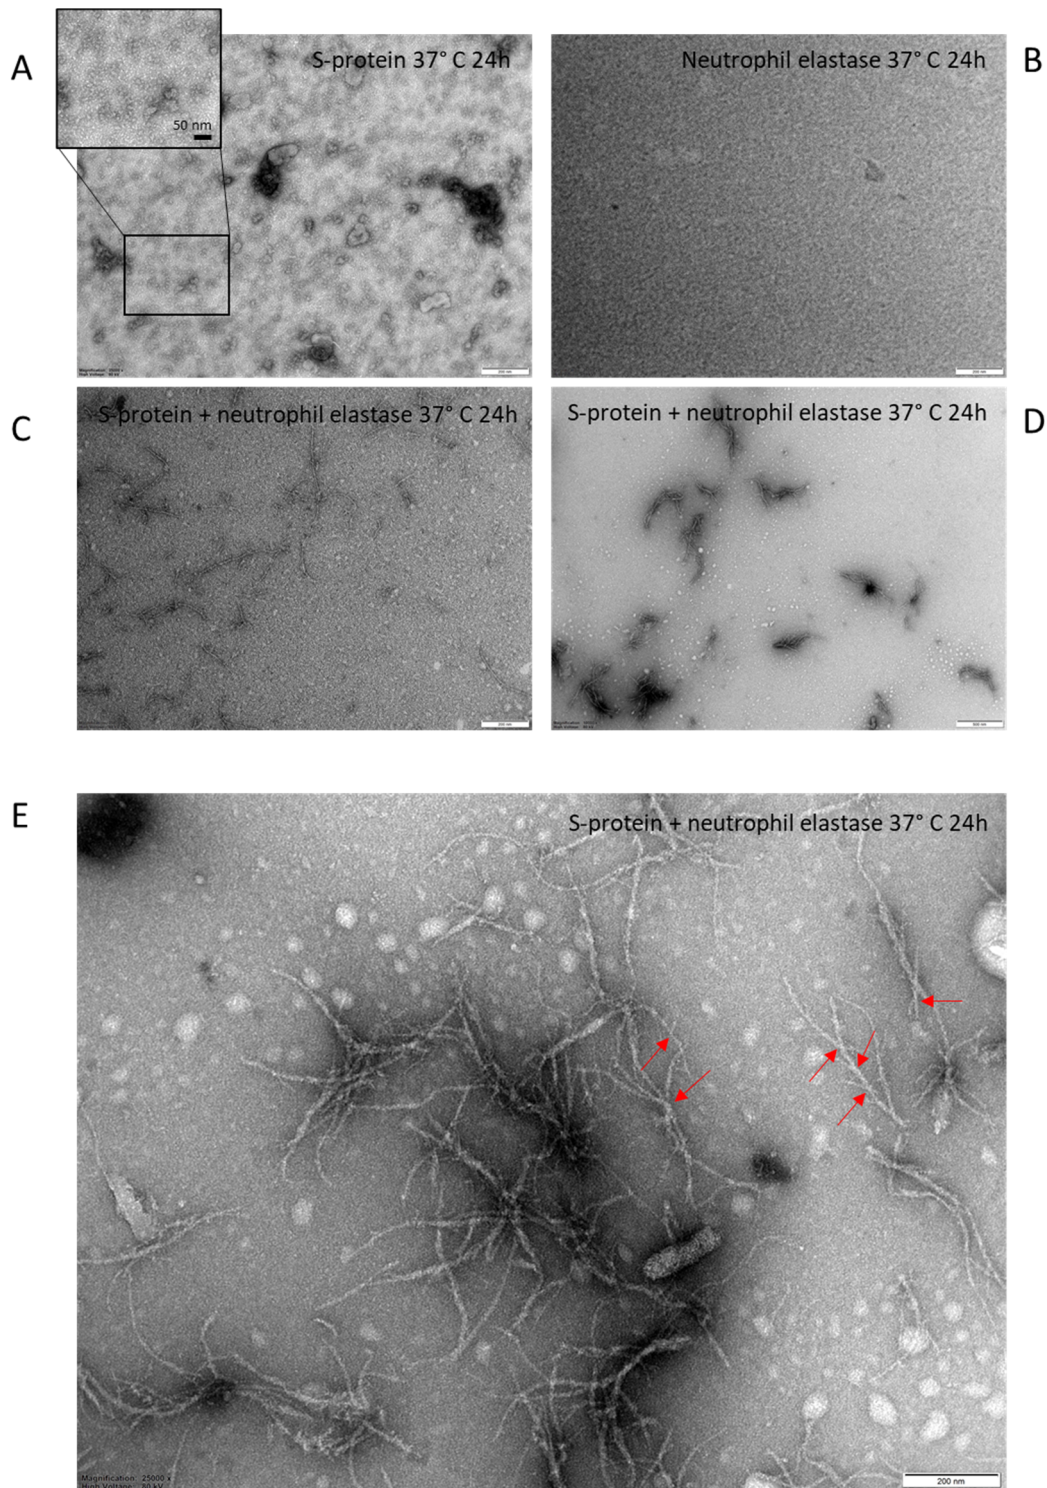

**Figure S5.** Negative stain TEM micrographs of **A.** S-protein, inset highlights the trimeric spike protein as displayed in [5] **B.** neutrophil elastase and **C-E.** S-Protein + elastase co-incubated in vitro at 37 °C for 24 h. S-protein trimer structures are visible in **A.** Fibrils were only formed in the co-incubated samples showing single filament fibrils in **C** and clusters of amyloid-like fibrils in **D.** The unusual fibril morphology with evident branching is clearly visible in the high magnification image in **E** and are highlighted with red arrows.

**Figure S6: *In silico* mutation of one amino acid in the amyloidogenic segment in Spike192**

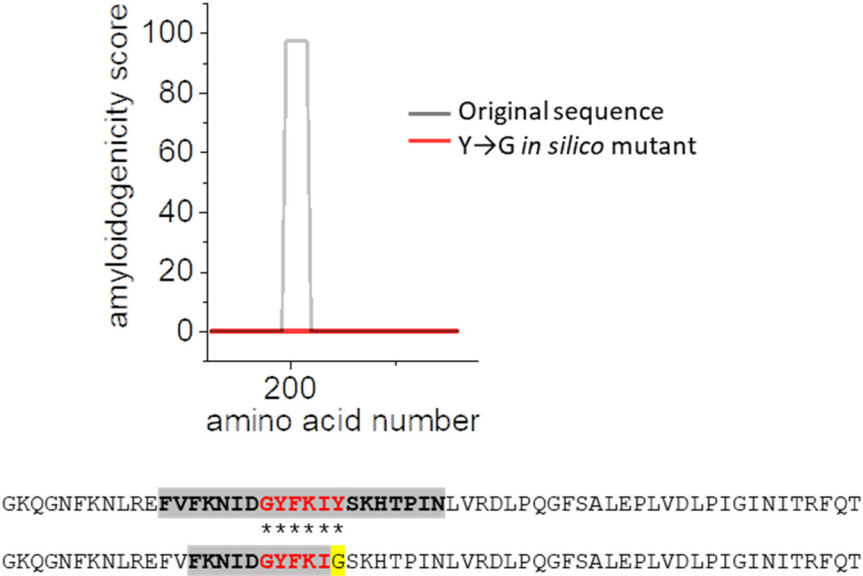

**Figure S6: *In silico* replacement of the final tyrosine residue in the amino acid stretch surrounding Spike192 peptide to a glycine abolished the predicted amyloidogenicity of the peptide.**

**Figure S7: Fluorescence micrographs and spectra of Spike192 fibrils stained with fluorescent analogs of amyloid PET tracers**

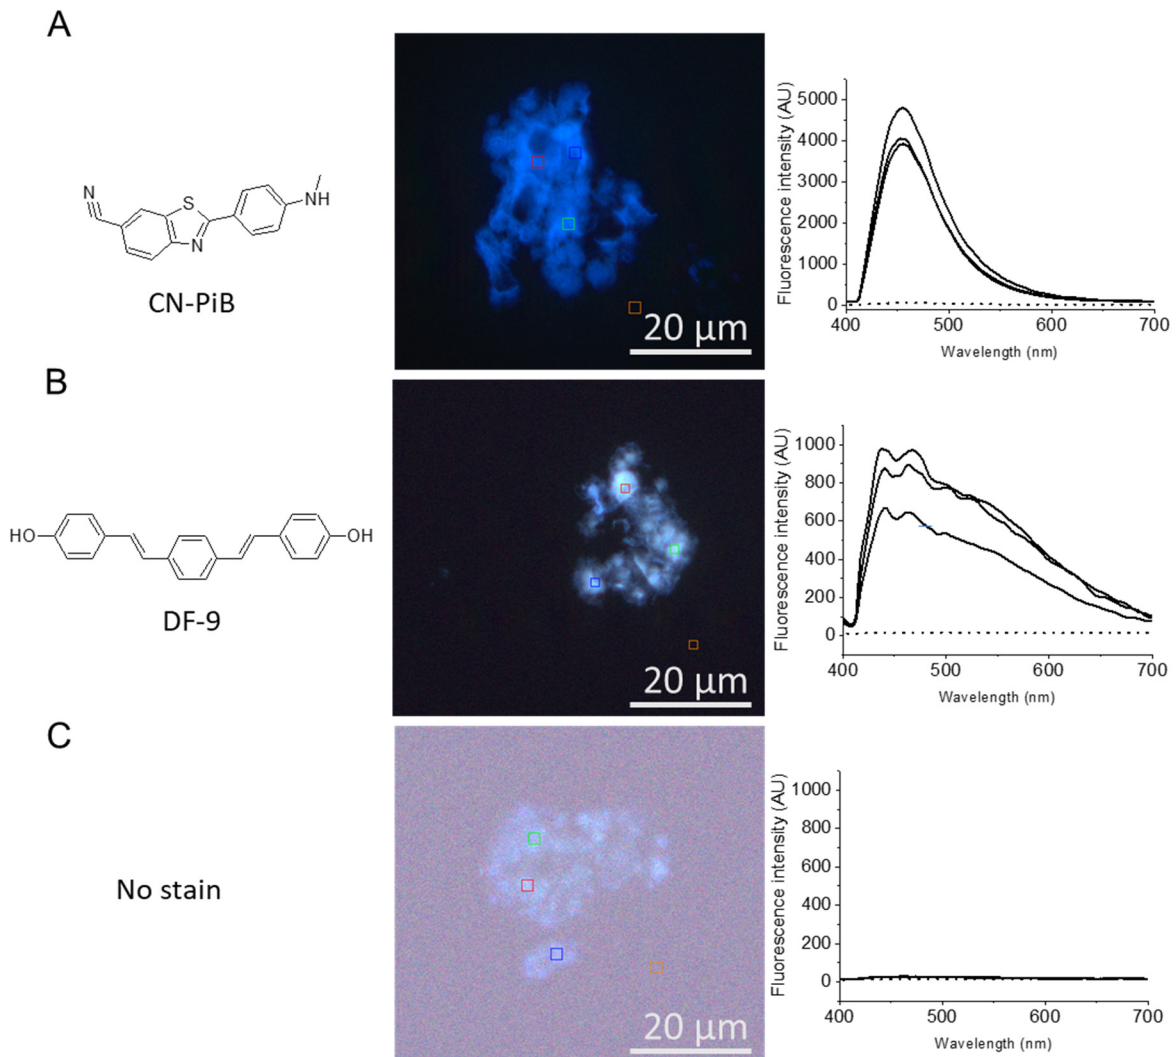

**Figure S7.** Fibrils of Spike192 stained with ligands CN-PiB (**A**) and DF-9 (**B**), fluorescent analogs of the PET tracers  $^{11}\text{C}$ -PiB and  $^{18}\text{F}$ -Florbetaben respectively, imaged with fluorescence hyperspectral microscopy. Both ligands show intense staining of fibrils with the expected emission spectra bound to amyloid fibrils. Spectra from three regions of interest (ROI) are depicted to the right of the micrographs, marked with colored squares in the micrographs. The brown colored ROIs are background signals outside of the aggregates and are as expected at very low intensity in the spectral graphs (dotted line). **C.** Autofluorescence from Spike192 fibrils at identical microscope settings shown in C is negligible as evident from the poor image contrast and intensity of the spectra.

**Figure S8: WALTZ amyloidogenic sequence predictions of S-protein sequences from seven corona viruses known to infect humans**

**A**

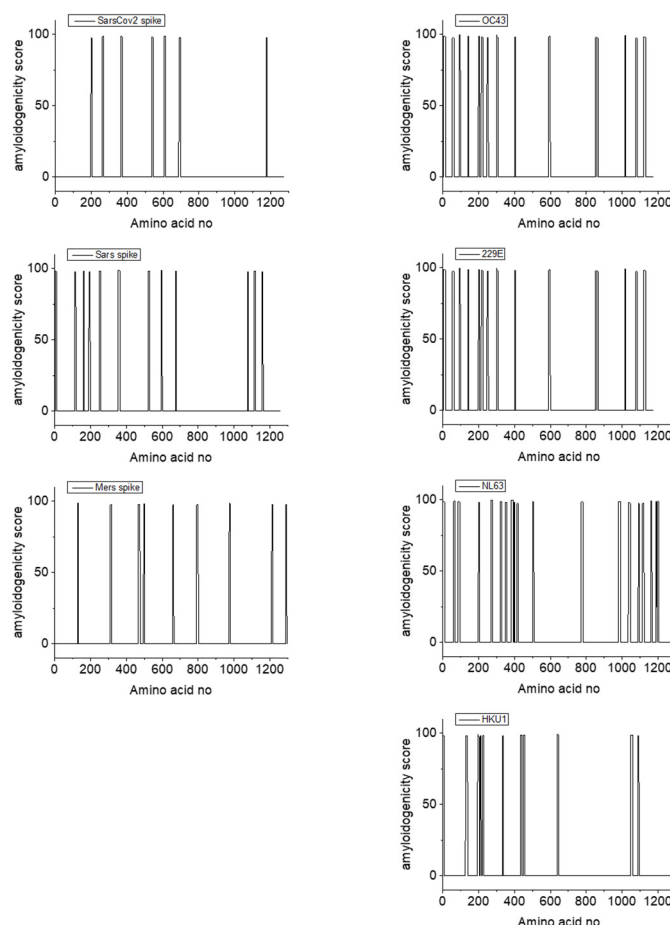

**B**

|          |                                                                                     |
|----------|-------------------------------------------------------------------------------------|
| MERS     | EDEILEWFGITQTAQGVHLFSSRYVD---LYGG-----N-MFQFATLPVYD                                 |
| SARS     | SLDVSEKSG---NFKHLREFVFKNK <b>DGFLVYK</b> GYQPIDVVRDLPSGFNTLKP IFKLPLGI              |
| SARSCOV2 | LMDLEGKQG---NFKNLREFV <b>FKNIDGYFKIYSKHTPINLV</b> RDLPQGFSALEPLVDLPIGI              |
|          | :: * . : : * : * : *                                                                |
|          | 176 233                                                                             |
| OC43     | TYDVNAT-----YLYFHFYQEGGTFYAYFTDTG-----FVTKF-----LFNVYLG                             |
| 229E     | NGTNTSH-----SVCNGCVGHSENVFAVESGGY-----IPSNF-----AFNNWFLL                            |
| NL63     | NGRIVNY-----TVCCDCNGYTDNIFSVQQDGR-----IPNGF-----SFNNWFLL                            |
| HKU1     | FTYNV <b>STD</b> ----- <b>WLYFFYQ</b> ERGT <b>FYAYY</b> ADSG-----MPTTF-----LFSLYLGT |
| SARSCOV2 | LMDLEGKQGNFKNLREFV <b>FKNIDGYFKIYSKHTPINLV</b> RDLPQGFSALEPLVDLPIGI                 |
|          | :: * . : : * : * : *                                                                |
|          | 176 233                                                                             |

**Figure S8 A)** WALTZ prediction of amyloidogenic sequences in Spike proteins from several corona viruses known to infect humans **B)** Sequence alignments of spike192 and flanking amino acids from the three corona viruses causing severe disease. MERS S-protein does not contain the amyloidogenic sequence, SARS S-protein contains a similar amyloidogenic sequence as SARS-CoV-2 S-protein in this part of the amino acid sequence. SARS-CoV-2 S-protein segment 194-213, highlighted in red was a peptide predicted for elastase cleavage.



## References

1. Maurer-Stroh, S., et al., *Exploring the sequence determinants of amyloid structure using position-specific scoring matrices*. Nat Methods, 2010. **7**(3): p. 237-42.
2. Jumper, J., et al., *Highly accurate protein structure prediction with AlphaFold*. Nature, 2021. **596**(7873): p. 583-589.
3. Terasawa, F., et al., *In vitro fibrin clot formation and fibrinolysis using heterozygous plasma fibrinogen from gammaAsn319, Asp320 deletion dysfibrinogen, Otsu I*. Thromb Res, 2006. **118**(5): p. 651-61.
4. Walls, A.C., et al., *Structure, Function, and Antigenicity of the SARS-CoV-2 Spike Glycoprotein*. Cell, 2020. **181**(2): p. 281-292 e6.
5. Edwards, R.J., et al., *Cold sensitivity of the SARS-CoV-2 spike ectodomain*. Nat Struct Mol Biol, 2021. **28**(2): p. 128-131.
